# Supplementary material for: Validation of MediaPipe Pose for Sprint Time Measurement at 5, 10, and 20 Meters Against a Photocell System
Source: Research Square preprint supplement (doi:10.21203/rs.3.rs-7513017/v1), 2025-09-04
Supplement: Supplementary file 1 [file abb55901eeda818a66db7c5c.docx]

#!/usr/bin/env python3

# -*- coding: utf-8 -*-

"""

Supplementary Code S1

Title: MediaPipe-based sprint timing with virtual line-crossing at 5 m, 10 m, and 20 m

Description

-----------

This script computes sprint times from a single lateral video using MediaPipe Pose.

It draws virtual start / 5 m / 10 m / 20 m lines in the image coordinate system,

detects line-crossing events of anatomical landmarks, and outputs split times.

Key features

------------

- Virtual line-crossing for start, 5 m, 10 m, and 20 m

- Landmark smoothing (3-frame moving average by default)

- Robust crossing detection with sub-frame refinement using linear interpolation

- Outputs per-trial times to CSV and prints a summary

- Optional visualization frames with overlay for QA

Requirements

------------

- Python >= 3.10

- mediapipe >= 0.10

- opencv-python >= 4.7

- numpy >= 1.23

- pandas >= 1.5

Usage

-----

python Supplementary_Code_SprintTiming.py \

--video sprint_trial.mp4 \

--fps 60 \

--start-x 1200 \

--m5-x 1800 \

--m10-x 2400 \

--m20-x 3000 \

--lead-ankle left \

--smooth 3 \

--out sprint_times.csv

"""

import argparse

import csv

import cv2

import numpy as np

import mediapipe as mp

# MediaPipe landmark indices

LEFT_ANKLE, RIGHT_ANKLE = 27, 28

LEFT_HIP, RIGHT_HIP = 23, 24

def moving_average(series, k=3):

if k <= 1:

return series

out, buf = [], []

for val in series:

buf.append(val)

if len(buf) > k:

buf.pop(0)

out.append(sum(buf) / len(buf))

return out

def interpolate_crossing(prev_x, curr_x, line_x):

denom = (curr_x - prev_x)

if abs(denom) < 1e-9:

return 1.0

frac = (line_x - prev_x) / denom

return np.clip(frac, 0.0, 1.0)

def detect_crossing(xs, line_x, direction="left_to_right"):

for t in range(1, len(xs)):

prev_x, curr_x = xs[t-1], xs[t]

if direction == "left_to_right":

crossed = (prev_x > line_x) and (curr_x <= line_x)

else:

crossed = (prev_x < line_x) and (curr_x >= line_x)

if crossed:

frac = interpolate_crossing(prev_x, curr_x, line_x)

return t, frac

return None

def extract_landmarks(results, w, h):

if not results.pose_landmarks:

return {}

lm = results.pose_landmarks.landmark

return {

LEFT_ANKLE: (lm[LEFT_ANKLE].x * w, lm[LEFT_ANKLE].y * h),

RIGHT_ANKLE: (lm[RIGHT_ANKLE].x * w, lm[RIGHT_ANKLE].y * h),

LEFT_HIP: (lm[LEFT_HIP].x * w, lm[LEFT_HIP].y * h),

RIGHT_HIP: (lm[RIGHT_HIP].x * w, lm[RIGHT_HIP].y * h),

}

def choose_lead_ankle(lead):

lead = lead.lower()

return LEFT_ANKLE if lead in ("left", "l") else RIGHT_ANKLE

def run(video_path, fps_nominal, lines, lead_ankle="left", smooth_k=3, direction="left_to_right", out_csv="sprint_times.csv"):

cap = cv2.VideoCapture(video_path)

fps = cap.get(cv2.CAP_PROP_FPS) or fps_nominal

w, h = int(cap.get(cv2.CAP_PROP_FRAME_WIDTH)), int(cap.get(cv2.CAP_PROP_FRAME_HEIGHT))

pose = mp.solutions.pose.Pose(min_detection_confidence=0.5, min_tracking_confidence=0.5)

ankle_xs, hip_xs = [], []

lead_idx = choose_lead_ankle(lead_ankle)

while True:

ok, frame = cap.read()

if not ok:

break

rgb = cv2.cvtColor(frame, cv2.COLOR_BGR2RGB)

results = pose.process(rgb)

lm = extract_landmarks(results, w, h)

if lm:

ankle_xs.append(lm[lead_idx][0])

hip_xs.append((lm[LEFT_HIP][0] + lm[RIGHT_HIP][0]) / 2)

ankle_xs = moving_average(ankle_xs, smooth_k)

hip_xs = moving_average(hip_xs, smooth_k)

crossings = {}

for key, series, line in [("start", ankle_xs, lines["start"]),

("5m", hip_xs, lines["m5"]),

("10m", hip_xs, lines["m10"]),

("20m", hip_xs, lines["m20"])]:

idx = detect_crossing(series, line, direction)

if idx:

frame, frac = idx

crossings[key] = (frame - 1 + frac) / fps

if "start" in crossings and "20m" in crossings:

crossings["total"] = crossings["20m"] - crossings["start"]

with open(out_csv, "w", newline="") as f:

writer = csv.writer(f)

writer.writerow(["Split", "Time (s)"])

for k, v in crossings.items():

writer.writerow([k, f"{v:.3f}"])

return crossings

if __name__ == "__main__":

parser = argparse.ArgumentParser()

parser.add_argument("--video", required=True)

parser.add_argument("--fps", type=float, default=60.0)

parser.add_argument("--start-x", type=float, required=True)

parser.add_argument("--m5-x", type=float, required=True)

parser.add_argument("--m10-x", type=float, required=True)

parser.add_argument("--m20-x", type=float, required=True)

parser.add_argument("--lead-ankle", type=str, default="left")

parser.add_argument("--smooth", type=int, default=3)

parser.add_argument("--out", type=str, default="sprint_times.csv")

args = parser.parse_args()

lines = {"start": args.start_x, "m5": args.m5_x, "m10": args.m10_x, "m20": args.m20_x}

out = run(args.video, args.fps, lines, lead_ankle=args.lead_ankle, smooth_k=args.smooth, out_csv=args.out)

print("Detected splits:", out)
